# Supplementary material
Source: PubMed Central journal article supplement (PMC8168112)
Supplement: djaa159_supplementary_data.pdf [file djaa159_supplementary_data.pdf]

## **Supplementary Materials**

### **Supplementary Methods**

#### ***Geographical Region***

The geographical region of the VA hospital each patient was tested in was extracted from structured data, with regions defined using the following mapping from the Corporate Data Warehouse:

- Continental (Arkansas, Colorado, Louisiana, Mississippi, Montana, Oklahoma, Texas, Utah, Wyoming)
- Midwest (Illinois, Indiana, Michigan, Minnesota, Missouri, Nebraska, North Dakota, Ohio, South Dakota, Wisconsin)
- North Atlantic (Connecticut, Delaware, District Of Columbia, Maine, Maryland, Massachusetts, New Hampshire, New Jersey, New York, North Carolina, Pennsylvania, Rhode Island, Vermont, Virginia, West Virginia)
- Pacific (Alaska, Arizona, California, Hawaii, Idaho, Nevada, New Mexico, Oregon, Washington)
- Southeast (Alabama, Florida, Georgia, Kentucky, Puerto Rico, South Carolina, Tennessee)

## Supplementary Tables

**Supplementary Table 1.** Patient characteristics in the full cohort of cancer patients tested for COVID-19, and stratified by patients who were negative or positive for COVID-19. BMI = body mass index, AMI = acute myocardial infarction, CHF = congestive heart failure, PVD = peripheral vascular disease, COPD = chronic obstructive pulmonary disease, MLD = mild liver disease, DIAB = diabetes without complications, DIABWC = diabetes with complications, REND = renal disease, MSLD = moderate or severe liver disease, HCC = hepatocellular carcinoma, CSCC = cutaneous squamous-cell carcinoma, MDS = myelodysplastic syndromes, SCCHN = squamous cell carcinoma of the head and neck, RCC = renal cell carcinoma, Heme = hematological malignancy, Solid = solid tumor, ICI = immune checkpoint inhibitor.

|                        | Overall, n (%) | Negative, n (%) | Positive, n (%) | P      |
|------------------------|----------------|-----------------|-----------------|--------|
| n                      | 22914          | 21120           | 1794            |        |
| Age (%)                |                |                 |                 | 0.16   |
| <50                    | 1542 ( 6.7)    | 1416 ( 6.7)     | 126 ( 7.0)      |        |
| 50-59                  | 2506 (10.9)    | 2307 (10.9)     | 199 (11.1)      |        |
| 60-64                  | 2691 (11.7)    | 2480 (11.7)     | 211 (11.8)      |        |
| 65-69                  | 3335 (14.6)    | 3108 (14.7)     | 227 (12.7)      |        |
| 70-79                  | 8714 (38.0)    | 8035 (38.0)     | 679 (37.8)      |        |
| >=80                   | 4126 (18.0)    | 3774 (17.9)     | 352 (19.6)      |        |
| Race (%)               |                |                 |                 | <0.001 |
| White                  | 15856 (69.2)   | 14986 (71.0)    | 870 (48.5)      |        |
| Black                  | 5430 (23.7)    | 4618 (21.9)     | 812 (45.3)      |        |
| Other or Unknown       | 1628 ( 7.1)    | 1516 ( 7.2)     | 112 ( 6.2)      |        |
| Ethnicity (%)          |                |                 |                 | <0.001 |
| Not Hispanic or Latino | 20942 (91.4)   | 19327 (91.5)    | 1615 (90.0)     |        |
| Hispanic or Latino     | 1288 ( 5.6)    | 1148 ( 5.4)     | 140 ( 7.8)      |        |
| Unknown                | 684 ( 3.0)     | 645 ( 3.1)      | 39 ( 2.2)       |        |
| Smoking (%)            |                |                 |                 | <0.001 |
| Current                | 8589 (37.5)    | 8137 (38.5)     | 452 (25.2)      |        |
| Former                 | 9315 (40.7)    | 8416 (39.8)     | 899 (50.1)      |        |
| Never                  | 3549 (15.5)    | 3227 (15.3)     | 322 (17.9)      |        |
| Unknown                | 1461 ( 6.4)    | 1340 ( 6.3)     | 121 ( 6.7)      |        |
| BMI (%)                |                |                 |                 | <0.001 |
| Underweight            | 603 ( 2.6)     | 564 ( 2.7)      | 39 ( 2.2)       |        |
| Normal                 | 5189 (22.6)    | 4864 (23.0)     | 325 (18.1)      |        |
| Overweight             | 7124 (31.1)    | 6573 (31.1)     | 551 (30.7)      |        |
| Obese                  | 9824 (42.9)    | 8956 (42.4)     | 868 (48.4)      |        |
| Unknown                | 174 ( 0.8)     | 163 ( 0.8)      | 11 ( 0.6)       |        |
| Charlson (%)           |                |                 |                 | <0.001 |

|                            |              |              |             |        |
|----------------------------|--------------|--------------|-------------|--------|
| 0                          | 2962 (12.9)  | 2692 (12.7)  | 270 (15.1)  |        |
| 1-2                        | 8215 (35.9)  | 7512 (35.6)  | 703 (39.2)  |        |
| 3-4                        | 6544 (28.6)  | 6085 (28.8)  | 459 (25.6)  |        |
| >=5                        | 5193 (22.7)  | 4831 (22.9)  | 362 (20.2)  |        |
| AMI                        | 2231 ( 9.7)  | 2079 ( 9.8)  | 152 ( 8.5)  | 0.07   |
| CHF                        | 5632 (24.6)  | 5256 (24.9)  | 376 (21.0)  | <0.001 |
| PVD                        | 4808 (21.0)  | 4495 (21.3)  | 313 (17.4)  | <0.001 |
| COPD                       | 8889 (38.8)  | 8332 (39.5)  | 557 (31.0)  | <0.001 |
| MLD                        | 2976 (13.0)  | 2757 (13.1)  | 219 (12.2)  | 0.32   |
| DIAB                       | 8949 (39.1)  | 8226 (38.9)  | 723 (40.3)  | 0.27   |
| DIABWC                     | 5999 (26.2)  | 5543 (26.2)  | 456 (25.4)  | 0.46   |
| REND                       | 5876 (25.6)  | 5382 (25.5)  | 494 (27.5)  | 0.06   |
| MSLD                       | 544 ( 2.4)   | 516 ( 2.4)   | 28 ( 1.6)   | 0.02   |
| Treatment Time (%)         |              |              |             | 0.002  |
| Never Treated              | 16396 (71.6) | 15063 (71.3) | 1333 (74.3) |        |
| Treated <= 6 Months Ago    | 3034 (13.2)  | 2845 (13.5)  | 189 (10.5)  |        |
| Treated > 6 Months Ago     | 3484 (15.2)  | 3212 (15.2)  | 272 (15.2)  |        |
| Esophagus                  | 331 ( 1.4)   | 320 ( 1.5)   | 11 ( 0.6)   | 0.003  |
| HCC                        | 1092 ( 4.8)  | 1046 ( 5.0)  | 46 ( 2.6)   | <0.001 |
| Lung                       | 2806 (12.2)  | 2685 (12.7)  | 121 ( 6.7)  | <0.001 |
| CSCC                       | 1188 ( 5.2)  | 1132 ( 5.4)  | 56 ( 3.1)   | <0.001 |
| Other Gastrointestinal     | 353 ( 1.5)   | 336 ( 1.6)   | 17 ( 0.9)   | 0.04   |
| Pancreas                   | 331 ( 1.4)   | 315 ( 1.5)   | 16 ( 0.9)   | 0.05   |
| Brain                      | 522 ( 2.3)   | 495 ( 2.3)   | 27 ( 1.5)   | 0.03   |
| Lymphoma                   | 2370 (10.3)  | 2247 (10.6)  | 123 ( 6.9)  | <0.001 |
| Acute Leukemia             | 288 ( 1.3)   | 273 ( 1.3)   | 15 ( 0.8)   | 0.12   |
| SCCHN                      | 2209 ( 9.6)  | 2087 ( 9.9)  | 122 ( 6.8)  | <0.001 |
| Melanoma                   | 902 ( 3.9)   | 851 ( 4.0)   | 51 ( 2.8)   | 0.02   |
| Neuroendocrine             | 344 ( 1.5)   | 324 ( 1.5)   | 20 ( 1.1)   | 0.19   |
| Bone                       | 2251 ( 9.8)  | 2110 (10.0)  | 141 ( 7.9)  | 0.004  |
| Breast                     | 462 ( 2.0)   | 433 ( 2.1)   | 29 ( 1.6)   | 0.24   |
| Gastric                    | 698 ( 3.0)   | 654 ( 3.1)   | 44 ( 2.5)   | 0.15   |
| Connective and Soft Tissue | 470 ( 2.1)   | 440 ( 2.1)   | 30 ( 1.7)   | 0.28   |
| Hodgkin                    | 202 ( 0.9)   | 189 ( 0.9)   | 13 ( 0.7)   | 0.54   |
| Urothelial                 | 2198 ( 9.6)  | 2056 ( 9.7)  | 142 ( 7.9)  | 0.01   |
| Ill Defined Site           | 2397 (10.5)  | 2238 (10.6)  | 159 ( 8.9)  | 0.02   |
| Thyroid                    | 275 ( 1.2)   | 256 ( 1.2)   | 19 ( 1.1)   | 0.65   |
| Rectum                     | 405 ( 1.8)   | 377 ( 1.8)   | 28 ( 1.6)   | 0.55   |
| Skin                       | 8961 (39.1)  | 8331 (39.4)  | 630 (35.1)  | <0.001 |

|                    |             |             |            |        |
|--------------------|-------------|-------------|------------|--------|
| RCC                | 1245 ( 5.4) | 1151 ( 5.4) | 94 ( 5.2)  | 0.75   |
| Chronic Leukemia   | 504 ( 2.2)  | 465 ( 2.2)  | 39 ( 2.2)  | 1.00   |
| Myeloid Malignancy | 1210 ( 5.3) | 1116 ( 5.3) | 94 ( 5.2)  | 0.98   |
| Endocrine Glands   | 949 ( 4.1)  | 872 ( 4.1)  | 77 ( 4.3)  | 0.79   |
| Colon              | 1299 ( 5.7) | 1188 ( 5.6) | 111 ( 6.2) | 0.35   |
| MDS                | 374 ( 1.6)  | 342 ( 1.6)  | 32 ( 1.8)  | 0.67   |
| Multiple Myeloma   | 1081 ( 4.7) | 980 ( 4.6)  | 101 ( 5.6) | 0.07   |
| Male Genital       | 341 ( 1.5)  | 309 ( 1.5)  | 32 ( 1.8)  | 0.33   |
| Prostate           | 4910 (21.4) | 4417 (20.9) | 493 (27.5) | <0.001 |

**Supplementary Table 2. Regional data on COVID-19 prevalence and race**

| <b>Demographics of Cancer Patients Tested for COVID-19 across Regions</b> |                              |                                |                                |
|---------------------------------------------------------------------------|------------------------------|--------------------------------|--------------------------------|
| <b>Region</b>                                                             | <b>Overall, n</b>            | <b>Black, n (% of Overall)</b> | <b>White, n (% of Overall)</b> |
| Continental                                                               | 3525                         | 826 (23.4%)                    | 2418 (68.6%)                   |
| Midwest                                                                   | 4581                         | 1076 (23.5%)                   | 3267 (71.3%)                   |
| North Atlantic                                                            | 5768                         | 1778 (30.8%)                   | 3736 (64.8%)                   |
| Pacific                                                                   | 4464                         | 627 (14.0%)                    | 3222 (72.2%)                   |
| Southeast                                                                 | 4576                         | 1123 (24.5%)                   | 3213 (70.2%)                   |
| All Regions                                                               | 22914                        | 5430 (23.7%)                   | 15856 (69.2%)                  |
| <b>Prevalence of COVID-19 across Regions</b>                              |                              |                                |                                |
| <b>Region</b>                                                             | <b>% Positive in Overall</b> | <b>% Positive in Black</b>     | <b>% Positive in White</b>     |
| Continental                                                               | 7.1                          | 15.3                           | 4.3                            |
| Midwest                                                                   | 8.6                          | 19.4                           | 5.2                            |
| North Atlantic                                                            | 14.8                         | 20.7                           | 11.5                           |
| Pacific                                                                   | 2.8                          | 3.3                            | 2.8                            |
| Southeast                                                                 | 3.7                          | 7.8                            | 2.4                            |
| All Regions                                                               | 7.8                          | 15.0                           | 5.5                            |

**Supplementary Table 3. Detailed data on COVID-19 prevalence and race unique by individual VA site (station).**

| VA Site                              | Demographics of Cancer Patients Tested for COVID-19 across VA Sites |                         |                         | Prevalence of COVID-19 across VA Sites |                     |                     |
|--------------------------------------|---------------------------------------------------------------------|-------------------------|-------------------------|----------------------------------------|---------------------|---------------------|
|                                      | Overall, n                                                          | Black, n (% of Overall) | White, n (% of Overall) | % Positive in Overall                  | % Positive in Black | % Positive in White |
| Togus ME                             | 107                                                                 | 0 (0.0%)                | 100 (93.5%)             | 1.9%                                   | 0.0%                | 1.0%                |
| White River Junction VT              | 54                                                                  | 1 (1.9%)                | 53 (98.1%)              | 0.0%                                   | 0.0%                | 0.0%                |
| Montana HCS (Fort Harrison MT)       | 40                                                                  | 1 (2.5%)                | 35 (87.5%)              | 0.0%                                   | 0.0%                | 0.0%                |
| Fargo, ND (CACHE 5.0)                | 61                                                                  | 0 (0.0%)                | 49 (80.3%)              | 1.6%                                   | 0.0%                | 2.0%                |
| Sioux Falls SD (CACHE 5.0)           | 73                                                                  | 2 (2.7%)                | 63 (86.3%)              | 1.4%                                   | 0.0%                | 1.6%                |
| Cheyenne WY                          | 63                                                                  | 1 (1.6%)                | 60 (95.2%)              | 6.3%                                   | 0.0%                | 6.7%                |
| VA Pacific Islands HCS (Honolulu HI) | 45                                                                  | 4 (8.9%)                | 22 (48.9%)              | 0.0%                                   | 0.0%                | 0.0%                |
| Wilmington DE                        | 77                                                                  | 30 (39.0%)              | 43 (55.8%)              | 10.4%                                  | 20.0%               | 4.7%                |
| Alaska VAHSRO (Anchorage AK)         | 31                                                                  | 1 (3.2%)                | 27 (87.1%)              | 0.0%                                   | 0.0%                | 0.0%                |
| New Mexico HCS (Albuquerque NM)      | 156                                                                 | 6 (3.8%)                | 111 (71.2%)             | 2.6%                                   | 0.0%                | 2.7%                |
| Alexandria, LA                       | 34                                                                  | 10 (29.4%)              | 23 (67.6%)              | 11.8%                                  | 30.0%               | 4.3%                |
| Altoona, PA                          | 23                                                                  | 1 (4.3%)                | 22 (95.7%)              | 0.0%                                   | 0.0%                | 0.0%                |
| Amarillo HCS (Amarillo TX)           | 93                                                                  | 3 (3.2%)                | 69 (74.2%)              | 3.2%                                   | 0.0%                | 4.3%                |
| Ann Arbor, MI                        | 136                                                                 | 13 (9.6%)               | 97 (71.3%)              | 11.0%                                  | 23.1%               | 9.3%                |
| Atlanta, GA                          | 280                                                                 | 186 (66.4%)             | 78 (27.9%)              | 10.4%                                  | 14.0%               | 2.6%                |
| Augusta, GA                          | 147                                                                 | 67 (45.6%)              | 73 (49.7%)              | 3.4%                                   | 4.5%                | 2.7%                |
| Maryland HCS (Baltimore MD)          | 142                                                                 | 82 (57.7%)              | 53 (37.3%)              | 7.7%                                   | 9.8%                | 3.8%                |
| Battle Creek, MI                     | 22                                                                  | 5 (22.7%)               | 15 (68.2%)              | 0.0%                                   | 0.0%                | 0.0%                |
| Bay Pines, FL                        | 357                                                                 | 26 (7.3%)               | 303 (84.9%)             | 1.7%                                   | 3.8%                | 1.3%                |
| Beckley, WV                          | 30                                                                  | 5 (16.7%)               | 25 (83.3%)              | 0.0%                                   | 0.0%                | 0.0%                |
| Bedford, MA                          | 104                                                                 | 4 (3.8%)                | 94 (90.4%)              | 28.8%                                  | 25.0%               | 27.7%               |
| West Texas HCS (Big Spring TX)       | 8                                                                   | 0 (0.0%)                | 7 (87.5%)               | 0.0%                                   | 0.0%                | 0.0%                |
| Biloxi, MS                           | 103                                                                 | 30 (29.1%)              | 63 (61.2%)              | 1.9%                                   | 0.0%                | 1.6%                |
| Birmingham, AL                       | 102                                                                 | 41 (40.2%)              | 57 (55.9%)              | 5.9%                                   | 9.8%                | 3.5%                |
| Boston HCS (Boston)                  | 391                                                                 | 41 (10.5%)              | 341 (87.2%)             | 16.4%                                  | 17.1%               | 15.8%               |
| Bronx, NY                            | 274                                                                 | 156 (56.9%)             | 101 (36.9%)             | 47.4%                                  | 44.2%               | 49.5%               |
| Upstate New York HCS                 | 569                                                                 | 92 (16.2%)              | 458 (80.5%)             | 6.5%                                   | 13.0%               | 5.0%                |
| Butler, PA                           | 36                                                                  | 1 (2.8%)                | 33 (91.7%)              | 2.8%                                   | 0.0%                | 3.0%                |

|                                             |     |             |             |       |       |       |
|---------------------------------------------|-----|-------------|-------------|-------|-------|-------|
| Boise, ID                                   | 157 | 1 (0.6%)    | 136 (86.6%) | 1.3%  | 0.0%  | 1.5%  |
| Charleston, SC                              | 161 | 58 (36.0%)  | 94 (58.4%)  | 0.0%  | 0.0%  | 0.0%  |
| Chicago (Westside), IL                      | 346 | 259 (74.9%) | 67 (19.4%)  | 22.3% | 25.5% | 13.4% |
| Chillicothe, OH                             | 101 | 4 (4.0%)    | 89 (88.1%)  | 3.0%  | 0.0%  | 3.4%  |
| Cincinnati, OH                              | 205 | 43 (21.0%)  | 157 (76.6%) | 3.9%  | 9.3%  | 2.5%  |
| Clarksburg, WV                              | 67  | 2 (3.0%)    | 65 (97.0%)  | 1.5%  | 50.0% | 0.0%  |
| Cleveland, OH                               | 297 | 109 (36.7%) | 169 (56.9%) | 8.8%  | 9.2%  | 8.9%  |
| Coatesville, PA                             | 41  | 11 (26.8%)  | 30 (73.2%)  | 12.2% | 18.2% | 10.0% |
| Columbia, SC                                | 221 | 115 (52.0%) | 101 (45.7%) | 4.5%  | 7.0%  | 2.0%  |
| Miami, FL                                   | 255 | 84 (32.9%)  | 163 (63.9%) | 11.8% | 16.7% | 9.2%  |
| West Palm Beach, FL                         | 243 | 46 (18.9%)  | 184 (75.7%) | 4.5%  | 6.5%  | 4.3%  |
| North Texas HCS (Dallas TX)                 | 279 | 84 (30.1%)  | 165 (59.1%) | 5.0%  | 7.1%  | 2.4%  |
| Illiana HCS (Danville IL)                   | 60  | 6 (10.0%)   | 52 (86.7%)  | 0.0%  | 0.0%  | 0.0%  |
| Dayton, OH                                  | 162 | 40 (24.7%)  | 116 (71.6%) | 1.9%  | 2.5%  | 1.7%  |
| Detroit, MI                                 | 192 | 131 (68.2%) | 56 (29.2%)  | 28.1% | 31.3% | 17.9% |
| Eastern Colorado HCS (Denver CO)            | 473 | 64 (13.5%)  | 369 (78.0%) | 8.7%  | 12.5% | 7.3%  |
| North Chicago, IL                           | 123 | 40 (32.5%)  | 78 (63.4%)  | 13.8% | 17.5% | 11.5% |
| Dublin, GA                                  | 87  | 36 (41.4%)  | 50 (57.5%)  | 0.0%  | 0.0%  | 0.0%  |
| Durham, NC                                  | 274 | 79 (28.8%)  | 180 (65.7%) | 4.4%  | 8.9%  | 2.8%  |
| New Jersey HCS (East Orange)                | 295 | 152 (51.5%) | 126 (42.7%) | 42.7% | 42.8% | 43.7% |
| Erie, PA                                    | 49  | 3 (6.1%)    | 42 (85.7%)  | 0.0%  | 0.0%  | 0.0%  |
| Fayetteville, AR                            | 40  | 0 (0.0%)    | 38 (95.0%)  | 2.5%  | 0.0%  | 2.6%  |
| Fayetteville, NC                            | 110 | 49 (44.5%)  | 53 (48.2%)  | 1.8%  | 2.0%  | 1.9%  |
| Black Hills HCS (Fort Meade SD) (CACHE 5.0) | 71  | 1 (1.4%)    | 64 (90.1%)  | 0.0%  | 0.0%  | 0.0%  |
| Central California HCS (Fresno CA)          | 104 | 6 (5.8%)    | 81 (77.9%)  | 1.0%  | 0.0%  | 1.2%  |
| N. Florida/S. Georgia HCS (Gainesville FL)  | 381 | 63 (16.5%)  | 293 (76.9%) | 2.4%  | 7.9%  | 1.0%  |
| Grand Junction, CO                          | 33  | 1 (3.0%)    | 31 (93.9%)  | 12.1% | 0.0%  | 12.9% |
| Hines, IL                                   | 319 | 100 (31.3%) | 206 (64.6%) | 11.0% | 16.0% | 8.3%  |
| Houston, TX                                 | 241 | 87 (36.1%)  | 145 (60.2%) | 1.7%  | 2.3%  | 1.4%  |
| Huntington, WV                              | 62  | 1 (1.6%)    | 59 (95.2%)  | 0.0%  | 0.0%  | 0.0%  |
| Indianapolis, IN                            | 284 | 68 (23.9%)  | 211 (74.3%) | 17.6% | 22.1% | 15.2% |
| Iron Mountain, MI                           | 22  | 0 (0.0%)    | 20 (90.9%)  | 4.5%  | 0.0%  | 5.0%  |
| Jackson, MS                                 | 62  | 28 (45.2%)  | 29 (46.8%)  | 6.5%  | 7.1%  | 6.9%  |
| VA Heartland West (Kansas City MO)          | 447 | 60 (13.4%)  | 370 (82.8%) | 3.8%  | 10.0% | 3.0%  |
| Hampton, VA                                 | 103 | 60 (58.3%)  | 36 (35.0%)  | 6.8%  | 8.3%  | 5.6%  |
| Southern Nevada HCS (Las Vegas NV)          | 119 | 26 (21.8%)  | 80 (67.2%)  | 7.6%  | 11.5% | 5.0%  |
| Lebanon, PA                                 | 113 | 10 (8.8%)   | 100 (88.5%) | 11.5% | 10.0% | 12.0% |

|                                            |     |             |             |       |       |       |
|--------------------------------------------|-----|-------------|-------------|-------|-------|-------|
| Lexington, KY                              | 244 | 20 (8.2%)   | 218 (89.3%) | 1.2%  | 5.0%  | 0.9%  |
| Central Arkansas HCS (Little Rock AR)      | 251 | 64 (25.5%)  | 178 (70.9%) | 1.2%  | 1.6%  | 1.1%  |
| Long Beach HCS (Long Beach CA)             | 315 | 57 (18.1%)  | 197 (62.5%) | 4.1%  | 5.3%  | 4.1%  |
| Louisville, KY                             | 340 | 66 (19.4%)  | 268 (78.8%) | 4.1%  | 7.6%  | 3.4%  |
| Loma Linda, CA                             | 267 | 42 (15.7%)  | 185 (69.3%) | 2.2%  | 0.0%  | 2.2%  |
| Madison, WI                                | 176 | 4 (2.3%)    | 167 (94.9%) | 1.1%  | 0.0%  | 1.2%  |
| Manchester, NH                             | 34  | 1 (2.9%)    | 32 (94.1%)  | 0.0%  | 0.0%  | 0.0%  |
| Northern Indiana HCS (Marion, IN)          | 76  | 8 (10.5%)   | 67 (88.2%)  | 2.6%  | 0.0%  | 3.0%  |
| Northern California HCS (Martinez CA)      | 211 | 28 (13.3%)  | 156 (73.9%) | 2.4%  | 0.0%  | 2.6%  |
| Martinsburg, WV                            | 107 | 13 (12.1%)  | 88 (82.2%)  | 3.7%  | 0.0%  | 4.5%  |
| Memphis, TN                                | 64  | 39 (60.9%)  | 24 (37.5%)  | 7.8%  | 10.3% | 4.2%  |
| Minneapolis, MN (CACHE 5.0)                | 301 | 19 (6.3%)   | 259 (86.0%) | 5.6%  | 21.1% | 4.6%  |
| Central Alabama HCS (Montgomery AL)        | 54  | 33 (61.1%)  | 19 (35.2%)  | 5.6%  | 9.1%  | 0.0%  |
| Hudson Valley HCS (Castle Point, Montrose) | 100 | 24 (24.0%)  | 70 (70.0%)  | 37.0% | 41.7% | 34.3% |
| Mountain Home, TN                          | 110 | 3 (2.7%)    | 104 (94.5%) | 2.7%  | 0.0%  | 2.9%  |
| Muskogee, OK                               | 238 | 25 (10.5%)  | 193 (81.1%) | 1.7%  | 0.0%  | 1.6%  |
| Tennessee Valley HCS (Nashville TN)        | 445 | 84 (18.9%)  | 338 (76.0%) | 2.9%  | 7.1%  | 2.1%  |
| New Orleans, LA                            | 402 | 231 (57.5%) | 149 (37.1%) | 30.3% | 39.8% | 17.4% |
| New York HHS (Brooklyn)                    | 203 | 101 (49.8%) | 82 (40.4%)  | 47.8% | 51.5% | 41.5% |
| Northampton, MA                            | 59  | 11 (18.6%)  | 43 (72.9%)  | 6.8%  | 0.0%  | 7.0%  |
| Northport, NY                              | 143 | 22 (15.4%)  | 118 (82.5%) | 30.8% | 31.8% | 30.5% |
| Oklahoma City, OK                          | 265 | 31 (11.7%)  | 209 (78.9%) | 3.8%  | 3.2%  | 4.3%  |
| Central Plains HCS (Omaha NE)              | 364 | 13 (3.6%)   | 330 (90.7%) | 4.9%  | 15.4% | 4.5%  |
| Asheville, NC                              | 141 | 10 (7.1%)   | 129 (91.5%) | 2.1%  | 0.0%  | 2.3%  |
| Palo Alto HCS (Palo Alto CA)               | 326 | 36 (11.0%)  | 235 (72.1%) | 3.1%  | 2.8%  | 3.0%  |
| Philadelphia, PA                           | 263 | 165 (62.7%) | 88 (33.5%)  | 20.2% | 23.6% | 12.5% |
| Phoenix, AZ                                | 152 | 11 (7.2%)   | 125 (82.2%) | 2.6%  | 0.0%  | 3.2%  |
| Pittsburgh HCS (Pittsburgh PA)             | 209 | 48 (23.0%)  | 159 (76.1%) | 3.3%  | 4.2%  | 3.1%  |
| Portland, OR (CACHE 5.0)                   | 303 | 10 (3.3%)   | 254 (83.8%) | 1.0%  | 0.0%  | 1.2%  |
| Northern Arizona HCS (Prescott AZ)         | 96  | 4 (4.2%)    | 81 (84.4%)  | 1.0%  | 0.0%  | 0.0%  |
| Providence, RI                             | 88  | 6 (6.8%)    | 78 (88.6%)  | 5.7%  | 0.0%  | 6.4%  |
| Richmond, VA                               | 305 | 152 (49.8%) | 148 (48.5%) | 7.2%  | 9.2%  | 5.4%  |
| Roseburg HCS (Roseburg OR)                 | 50  | 0 (0.0%)    | 47 (94.0%)  | 0.0%  | 0.0%  | 0.0%  |
| Sierra Nevada HCS (Reno NV)                | 109 | 2 (1.8%)    | 99 (90.8%)  | 1.8%  | 0.0%  | 2.0%  |
| Saginaw, MI                                | 17  | 3 (17.6%)   | 12 (70.6%)  | 0.0%  | 0.0%  | 0.0%  |



|                                              |       |              |               |       |       |        |
|----------------------------------------------|-------|--------------|---------------|-------|-------|--------|
| St. Cloud, MN (CACHE 5.0)                    | 116   | 1 (0.9%)     | 102 (87.9%)   | 0.0%  | 0.0%  | 0.0%   |
| VA Heartland East (Saint Louis MO)           | 222   | 69 (31.1%)   | 148 (66.7%)   | 9.5%  | 24.6% | 2.7%   |
| Salem, VA                                    | 79    | 16 (20.3%)   | 60 (75.9%)    | 1.3%  | 0.0%  | 1.7%   |
| Salisbury, NC                                | 205   | 56 (27.3%)   | 146 (71.2%)   | 6.3%  | 8.9%  | 5.5%   |
| Salt Lake City HCS (Salt Lake City UT)       | 212   | 5 (2.4%)     | 198 (93.4%)   | 2.8%  | 0.0%  | 2.5%   |
| San Francisco, CA                            | 279   | 66 (23.7%)   | 161 (57.7%)   | 2.5%  | 1.5%  | 3.7%   |
| Puget Sound HCS (Seattle WA) (CACHE 5.0)     | 551   | 66 (12.0%)   | 429 (77.9%)   | 2.7%  | 6.1%  | 2.3%   |
| San Diego HCS (San Diego CA)                 | 340   | 31 (9.1%)    | 259 (76.2%)   | 2.1%  | 3.2%  | 1.9%   |
| Sheridan, WY                                 | 16    | 0 (0.0%)     | 15 (93.8%)    | 0.0%  | 0.0%  | 0.0%   |
| Shreveport, LA                               | 236   | 102 (43.2%)  | 121 (51.3%)   | 5.1%  | 10.8% | 0.8%   |
| Spokane, WA                                  | 92    | 1 (1.1%)     | 73 (79.3%)    | 5.4%  | 0.0%  | 6.8%   |
| South Texas HCS (San Antonio TX)             | 214   | 24 (11.2%)   | 159 (74.3%)   | 1.9%  | 0.0%  | 2.5%   |
| San Juan, PR                                 | 332   | 35 (10.5%)   | 281 (84.6%)   | 3.3%  | 8.6%  | 2.8%   |
| Tampa, FL                                    | 301   | 49 (16.3%)   | 226 (75.1%)   | 1.0%  | 2.0%  | 0.9%   |
| Central Texas HCS (Temple TX)                | 216   | 35 (16.2%)   | 159 (73.6%)   | 2.3%  | 0.0%  | 2.5%   |
| Orlando, FL                                  | 395   | 47 (11.9%)   | 308 (78.0%)   | 2.3%  | 0.0%  | 2.3%   |
| Tomah, WI                                    | 71    | 1 (1.4%)     | 70 (98.6%)    | 0.0%  | 0.0%  | 0.0%   |
| Southern Arizona HCS (Tucson AZ)             | 219   | 11 (5.0%)    | 193 (88.1%)   | 2.3%  | 0.0%  | 2.6%   |
| Tuscaloosa, AL                               | 57    | 25 (43.9%)   | 31 (54.4%)    | 1.8%  | 4.0%  | 0.0%   |
| Walla Walla, WA                              | 8     | 0 (0.0%)     | 7 (87.5%)     | 0.0%  | 0.0%  | 0.0%   |
| Washington DC                                | 395   | 294 (74.4%)  | 67 (17.0%)    | 12.7% | 13.3% | 7.5%   |
| Connecticut HCS (Westhaven)                  | 433   | 79 (18.2%)   | 333 (76.9%)   | 13.9% | 19.0% | 12.9%  |
| Greater Los Angeles HCS (Los Angeles CA)     | 530   | 217 (40.9%)  | 261 (49.2%)   | 5.1%  | 3.7%  | 6.5%   |
| White City, OR (CACHE 5.0)                   | 4     | 1 (25.0%)    | 3 (75.0%)     | 0.0%  | 0.0%  | 0.0%   |
| Wilkes-Barre, PA                             | 83    | 0 (0.0%)     | 81 (97.6%)    | 3.6%  | 0.0%  | 3.7%   |
| Milwaukee, WI                                | 297   | 73 (24.6%)   | 219 (73.7%)   | 9.1%  | 21.9% | 4.6%   |
| Texas Valley Coastal Bend HCS (Harlingen TX) | 2     | 0 (0.0%)     | 2 (100.0%)    | 0.0%  | 0.0%  | 0.0%   |
| El Paso, TX                                  | 4     | 0 (0.0%)     | 1 (25.0%)     | 50.0% | 0.0%  | 100.0% |
| Columbus, OH                                 | 20    | 4 (20.0%)    | 14 (70.0%)    | 5.0%  | 25.0% | 0.0%   |
| All                                          | 22914 | 5430 (23.7%) | 15856 (69.2%) | 7.8%  | 15.0% | 5.5%   |

**Supplementary Table 4.** Odds ratio (OR) as to COVID-19 positive status by cancer type, in univariate logistic regression analysis and multivariate logistic regression, adjusting for race, ethnicity and smoking status. The associated 95% confidence interval and P value is also shown for each analysis. The reference category is COVID-19 negative status.

| Cancer Type                | Multivariate Analysis |        | Univariate Analysis |        |
|----------------------------|-----------------------|--------|---------------------|--------|
|                            | OR (95% CI)           | P      | OR (95% CI)         | P      |
| Esophagus                  | 0.48 (0.26-0.89)      | 0.02   | 0.4 (0.22-0.73)     | 0.003  |
| HCC                        | 0.5 (0.37-0.68)       | <0.001 | 0.51 (0.37-0.68)    | <0.001 |
| Lung                       | 0.55 (0.45-0.66)      | <0.001 | 0.5 (0.41-0.6)      | <0.001 |
| CSCC                       | 0.76 (0.58-1)         | 0.05   | 0.57 (0.43-0.75)    | <0.001 |
| Other Gastrointestinal     | 0.57 (0.35-0.94)      | 0.03   | 0.59 (0.36-0.97)    | 0.04   |
| Pancreas                   | 0.57 (0.34-0.96)      | 0.03   | 0.59 (0.36-0.98)    | 0.04   |
| Brain                      | 0.66 (0.45-0.98)      | 0.04   | 0.64 (0.43-0.94)    | 0.02   |
| Lymphoma                   | 0.64 (0.53-0.77)      | <0.001 | 0.62 (0.51-0.75)    | <0.001 |
| Acute Leukemia             | 0.59 (0.35-1)         | 0.05   | 0.64 (0.38-1.09)    | 0.10   |
| SCCHN                      | 0.73 (0.61-0.89)      | 0.002  | 0.67 (0.55-0.8)     | <0.001 |
| Melanoma                   | 0.97 (0.72-1.3)       | 0.83   | 0.7 (0.52-0.93)     | 0.01   |
| Neuroendocrine             | 0.73 (0.46-1.16)      | 0.18   | 0.72 (0.46-1.14)    | 0.16   |
| Bone                       | 0.82 (0.68-0.98)      | 0.03   | 0.77 (0.64-0.92)    | 0.004  |
| Breast                     | 0.67 (0.46-0.99)      | 0.045  | 0.78 (0.54-1.15)    | 0.21   |
| Gastric                    | 0.79 (0.58-1.09)      | 0.15   | 0.79 (0.58-1.07)    | 0.13   |
| Connective and Soft Tissue | 0.77 (0.53-1.12)      | 0.17   | 0.8 (0.55-1.16)     | 0.24   |
| Hodgkin                    | 0.9 (0.51-1.59)       | 0.71   | 0.81 (0.46-1.42)    | 0.46   |
| Urothelial                 | 0.83 (0.69-0.99)      | 0.04   | 0.8 (0.67-0.95)     | 0.01   |
| Ill Defined Site           | 0.84 (0.7-0.99)       | 0.04   | 0.82 (0.69-0.97)    | 0.02   |
| Thyroid                    | 0.86 (0.53-1.38)      | 0.53   | 0.87 (0.55-1.39)    | 0.57   |
| Rectum                     | 0.89 (0.6-1.32)       | 0.56   | 0.87 (0.59-1.28)    | 0.49   |
| Skin                       | 1.13 (1.01-1.25)      | 0.03   | 0.83 (0.75-0.92)    | <0.001 |
| RCC                        | 0.87 (0.7-1.09)       | 0.23   | 0.96 (0.77-1.19)    | 0.71   |
| Chronic Leukemia           | 1.01 (0.72-1.41)      | 0.96   | 0.99 (0.71-1.37)    | 0.94   |
| Myeloid Malignancy         | 1.03 (0.83-1.29)      | 0.76   | 0.99 (0.8-1.23)     | 0.94   |
| Endocrine Glands           | 0.94 (0.74-1.2)       | 0.63   | 1.04 (0.82-1.32)    | 0.74   |
| Colon                      | 1.06 (0.86-1.3)       | 0.59   | 1.11 (0.91-1.35)    | 0.32   |
| MDS                        | 1.02 (0.71-1.49)      | 0.90   | 1.1 (0.77-1.59)     | 0.58   |
| Multiple Myeloma           | 0.98 (0.79-1.22)      | 0.86   | 1.23 (0.99-1.51)    | 0.06   |
| Male Genital               | 1.19 (0.81-1.72)      | 0.37   | 1.22 (0.85-1.77)    | 0.28   |
| Prostate                   | 1.09 (0.97-1.22)      | 0.14   | 1.43 (1.29-1.6)     | <0.001 |

**Supplementary Table 5.** Outcomes by Race and COVID-19 Result

|                     | Outcome in COVID-19 Negative patients<br>n (%) |             | Outcome in COVID-19 Positive patients<br>n (%) |            | COVID-19 attributable outcome % |      | Ratio of COVID-19 attributable outcome in AA/White |
|---------------------|------------------------------------------------|-------------|------------------------------------------------|------------|---------------------------------|------|----------------------------------------------------|
|                     | White                                          | AA          | White                                          | AA         | White                           | AA   |                                                    |
| Hospitalization     | 4835 (32.3)                                    | 1365 (29.6) | 332 (38.2)                                     | 410 (50.5) | 5.9                             | 20.9 | 3.5                                                |
| ICU                 | 1204 (8.0)                                     | 350 (7.6)   | 159 (18.3)                                     | 173 (21.3) | 10.3                            | 13.7 | 1.3                                                |
| Respiratory Support | 191 (1.3)                                      | 60 (1.3)    | 63 (7.2)                                       | 72 ( 8.9)  | 5.9                             | 7.6  | 1.3                                                |
| Death               | 482 (3.2)                                      | 129 (2.8)   | 122 (14.0)                                     | 120 (14.8) | 10.8                            | 12   | 1.1                                                |

**Supplementary Table 6.** Outcomes by Ethnicity and COVID-19 Result

|                     | Outcome in COVID-19 Negative patients<br>n (%) |                    | Outcome in COVID-19 Positive patients<br>n (%) |                    | COVID-19 attributable outcome % |                    | Ratio of COVID-19 attributable outcome in Hispanic or Latino/Not Hispanic or Latino |
|---------------------|------------------------------------------------|--------------------|------------------------------------------------|--------------------|---------------------------------|--------------------|-------------------------------------------------------------------------------------|
|                     | Not Hispanic or Latino                         | Hispanic or Latino | Not Hispanic or Latino                         | Hispanic or Latino | Not Hispanic or Latino          | Hispanic or Latino |                                                                                     |
| Hospitalization     | 6123 (31.7)                                    | 324 (28.2)         | 715 (44.3)                                     | 54 (38.6)          | 12.6                            | 10.4               | 0.8                                                                                 |
| ICU                 | 1518 ( 7.9)                                    | 86 ( 7.5)          | 322 (19.9)                                     | 24 (17.1)          | 12.0                            | 9.6                | 0.8                                                                                 |
| Respiratory Support | 244 ( 1.3)                                     | 20 ( 1.7)          | 133 ( 8.2)                                     | 7 ( 5.0)           | 6.9                             | 3.3                | 0.5                                                                                 |
| Death               | 604 ( 3.1)                                     | 34 ( 3.0)          | 237 (14.7)                                     | 13 ( 9.3)          | 11.6                            | 6.3                | 0.5                                                                                 |

**Supplementary Table 7. Outcomes by Tumor Type and COVID-19 Result**

|                     | Outcome in COVID-19 Negative patients<br>n (%) |            |                | Outcome in COVID-19 Positive patients<br>n (%) |           |                | COVID-19 attributable outcome % |      |                |
|---------------------|------------------------------------------------|------------|----------------|------------------------------------------------|-----------|----------------|---------------------------------|------|----------------|
|                     | Solid                                          | Heme       | Solid and Heme | Solid                                          | Heme      | Solid and Heme | Solid                           | Heme | Solid and Heme |
| Hospitalization     | 5211 (29.6)                                    | 548 (38.1) | 886 (42.8)     | 626 (42.2)                                     | 95 (54.0) | 65 (48.5)      | 12.6                            | 15.9 | 5.7            |
| ICU                 | 1283 (7.3)                                     | 135 (9.4)  | 237 (11.4)     | 283 (19.1)                                     | 43 (24.4) | 27 (20.1)      | 11.8                            | 15.0 | 8.7            |
| Respiratory Support | 206 (1.2)                                      | 23 (1.6)   | 41 (2.0)       | 117 ( 7.9)                                     | 19 (10.8) | 6 (4.5)        | 6.7                             | 9.2  | 2.5            |
| Death               | 520 (3.0)                                      | 45 (3.1)   | 98 (4.7)       | 200 (13.5)                                     | 30 (17.0) | 21 (15.7)      | 10.5                            | 13.9 | 11.0           |
